# Supplementary material for: Highly efficient CRISPR-Cas9-mediated gene knockout in primary human B cells for functional genetic studies of Epstein-Barr virus infection
Source: PubMed Central journal article supplement (PMC8078793; doi:10.1371/journal.ppat.1009117), 2021-04-15

A

## MiSeq sequencing and data analysis of CD46-Cas9 cells and controls

Outknocker web tool

CD46 Cas9 cells:  
Knockout efficiency: 84.2 %WT cells:  
Knockout efficiency: 0.1 %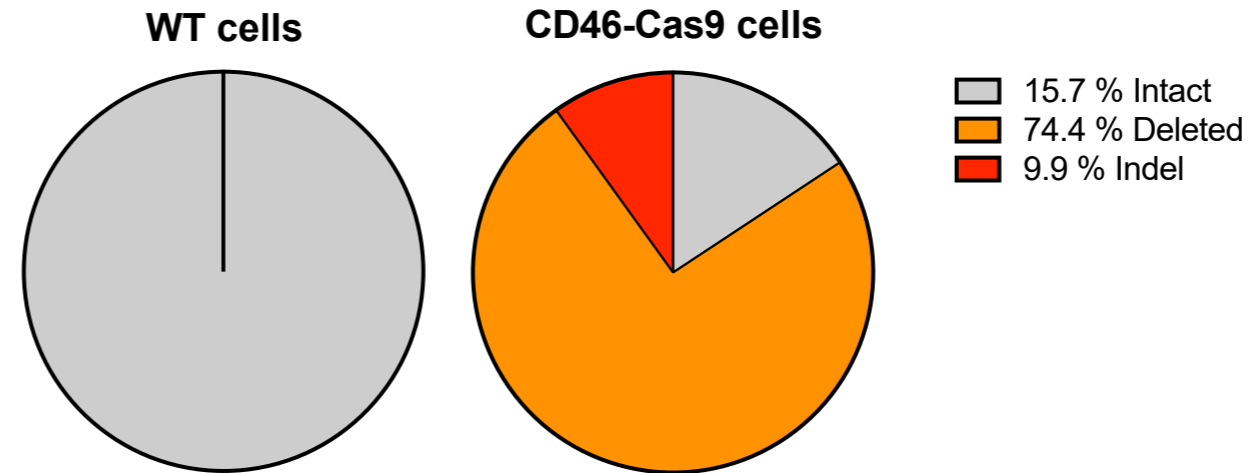

| REFERENCE      | CTATGGAGCTCATTGGTAAACCAAAC                                                      | PAM<br>CCTACTATGAGATTGGTGAACGA | GTAGATTATAAGTGTA AAAAAGGATACTTC |               |
|----------------|---------------------------------------------------------------------------------|--------------------------------|---------------------------------|---------------|
| Intact         |                                                                                 |                                |                                 | <b>15.71%</b> |
| no indel       | CTATGGAGCTCATTGGTAAACCAAACCTACTATGAGATTGGTGAACGAGTAGATTATAAGTGTA AAAAAGGATACTTC |                                |                                 | 919 reads     |
| <b>Deleted</b> |                                                                                 |                                |                                 | <b>74.35%</b> |
| 90nt deletion  | CTATGGAGCTCATTGGTAAACCAAACCTACTAT                                               |                                |                                 | 274 reads     |
| 91nt deletion  | CTATGGAGCTCATTGGTAAACCAAACCTACT                                                 |                                |                                 | 2995 reads    |
| 92nt deletion  | CTATGGAGCTCATTGGTAAACCAAACCTACTA                                                |                                |                                 | 1081 reads    |
| <b>Indel</b>   |                                                                                 |                                |                                 | <b>9.94%</b>  |
| 1nt deletion   | CTATGGAGCTCATTGGTAAACCAAACCTACT_TGAGATTGGTGAACGAGTAGATTATAAGTGTA AAAAAGGATACTTC |                                |                                 | 316 reads     |
| 2nt deletion   | CTATGGAGCTCATTGGTAAACCAAACCTACT__GAGATTGGTGAACGAGTAGATTATAAGTGTA AAAAAGGATACTTC |                                |                                 | 265 reads     |

B

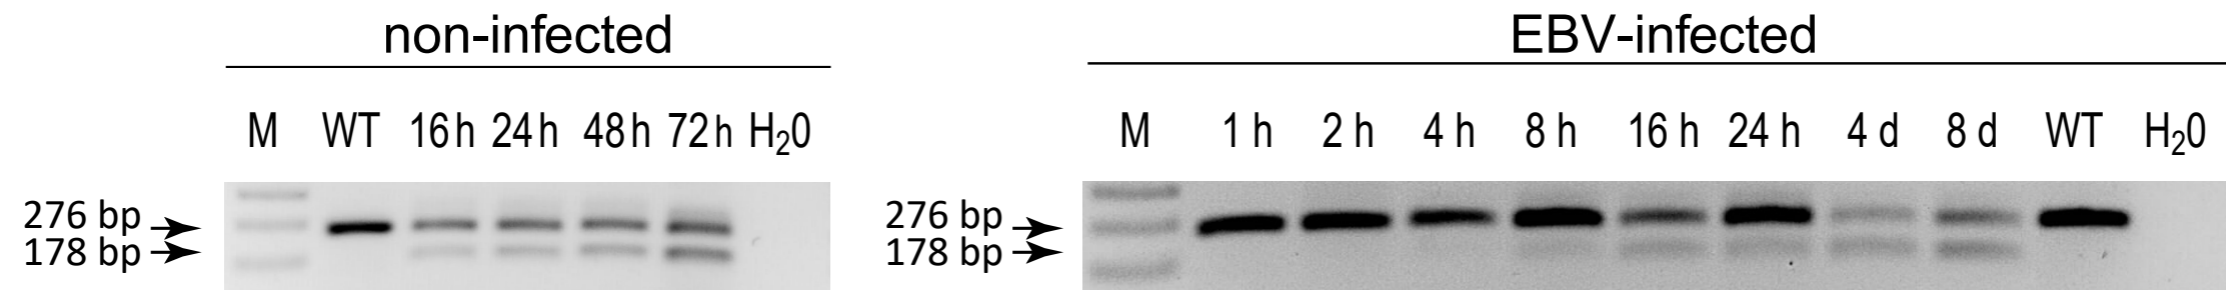

Supplement: ppat.1009117.s001.pdf [file ppat.1009117.s001.pdf]
