# Supplementary material for: Highly efficient CRISPR-Cas9-mediated gene knockout in primary human B cells for functional genetic studies of Epstein-Barr virus infection
Source: PubMed Central journal article supplement (PMC8078793; doi:10.1371/journal.ppat.1009117), 2021-04-15
Supplement: ppat.1009117.s003.pdf [file ppat.1009117.s003.pdf]

# MiSeq sequencing and data analysis of p16 KO cells and controls

Outknocker web tool

p16 KO cells:  
Knockout efficiency: 74.6 %

WT cells:  
Knockout efficiency: 0.1 %

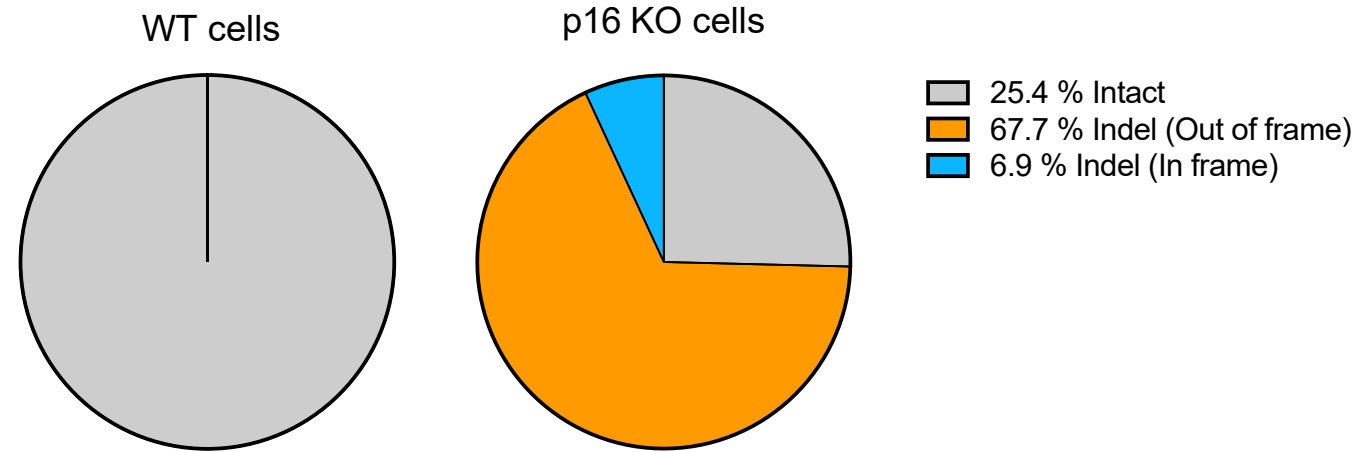

| REFERENCE                   | CCTCTACCCACCTGGATCGGCCTCCGACCGTAACTATTCGGTGC GTTGGG                                 | CAGCGCCCCCGCCTCCAGCAGCGCCCCGCAC |
|-----------------------------|-------------------------------------------------------------------------------------|---------------------------------|
| Intact                      | 25.4 %                                                                              |                                 |
| no indel                    | CCTCTACCCACCTGGATCGGCCTCCGACCGTAACTATTCGGTGC GTTGGGCAGCGCCCCCGCCTCCAGCAGCGCCCCGCAC  | 1145 reads                      |
| <b>Indel (Out of frame)</b> | <b>67.7 %</b>                                                                       |                                 |
| 1nt deletion                | CCTCTACCCACCTGGATCGGCCTCCGACCGTAACTA_TCGGTGC GTTGGGCAGCGCCCCCGCCTCCAGCAGCGCCCCGCAC  | 702 reads                       |
|                             | CCTCTACCCACCTGGATCGGCCTCCGACCGTA_CTATTCGGTGC GTTGGGCAGCGCCCCCGCCTCCAGCAGCGCCCCGCAC  |                                 |
| 1nt insertion               | CCTCTACCCACCTGGATCGGCCTCCGACCGTAAACTATTCGGTGC GTTGGGCAGCGCCCCCGCCTCCAGCAGCGCCCCGCAC |                                 |
| 2nt deletion                | CCTCTACCCACCTGGATCGGCCTCCGACCGTAA__ATTCGGTGC GTTGGGCAGCGCCCCCGCCTCCAGCAGCGCCCCGCAC  |                                 |
| 4nt deletion                | CCTCTACCCACCTGGATCGGCCTCCGACCGTAA____CGGTGC GTTGGGCAGCGCCCCCGCCTCCAGCAGCGCCCCGCAC   |                                 |
|                             | CCTCTACCCACCTGGATCGGCCTCCGACCGTA____TTCGGTGC GTTGGGCAGCGCCCCCGCCTCCAGCAGCGCCCCGCAC  |                                 |
| 5nt deletion                | CCTCTACCCACCTGGATCGGCCTCCGACCGTAAAC_____GGTGC GTTGGGCAGCGCCCCCGCCTCCAGCAGCGCCCCGCAC |                                 |
| <b>Indel (In frame)</b>     | <b>6.9 %</b>                                                                        |                                 |
| 3nt deletion                | CCTCTACCCACCTGGATCGGCCTCCGACCGTAA___TTCGGTGC GTTGGGCAGCGCCCCCGCCTCCAGCAGCGCCCCGCAC  | 316 reads                       |
