# Supplementary material for: Highly efficient CRISPR-Cas9-mediated gene knockout in primary human B cells for functional genetic studies of Epstein-Barr virus infection
Source: PubMed Central journal article supplement (PMC8078793; doi:10.1371/journal.ppat.1009117), 2021-04-15

A

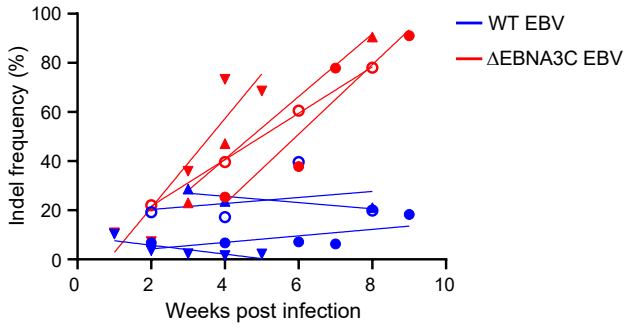

B

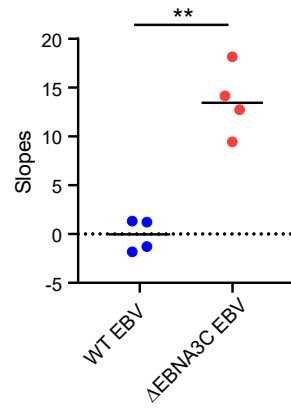

C

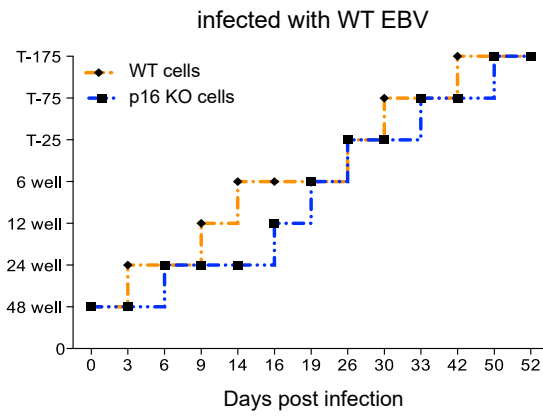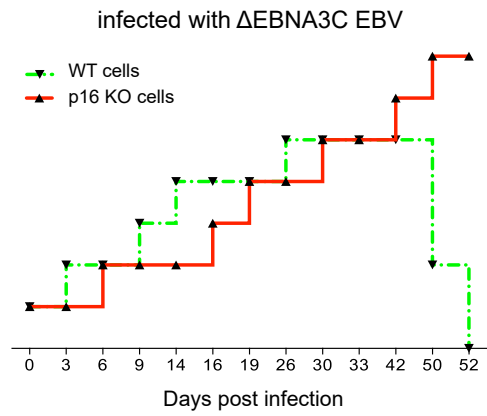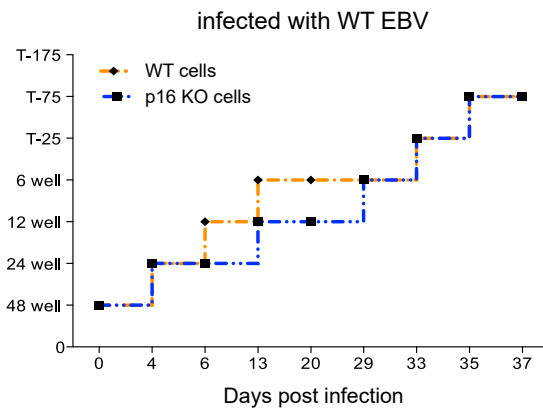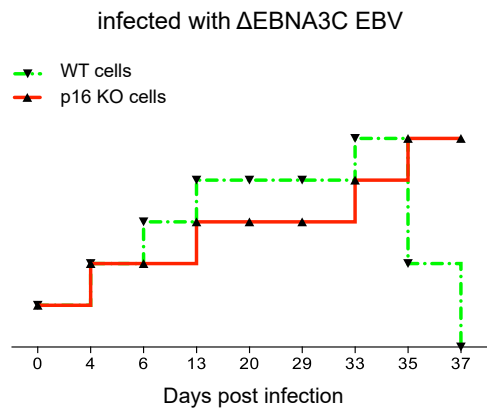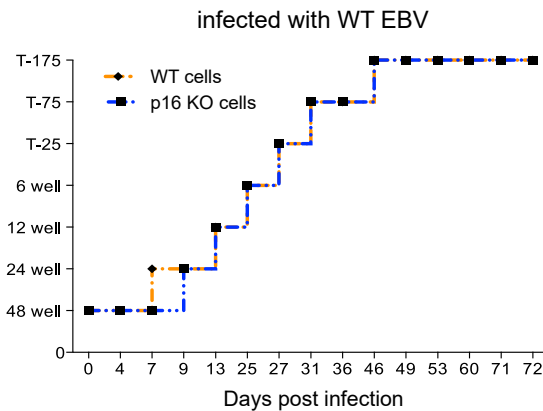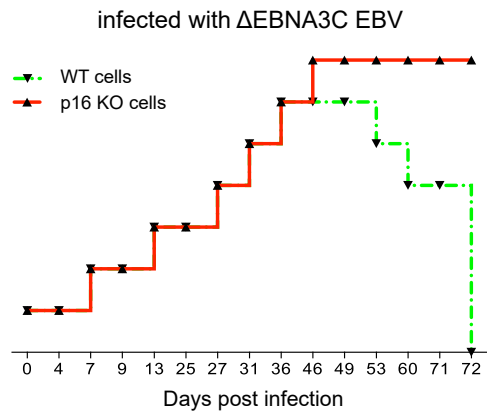

Supplement: ppat.1009117.s004.pdf [file ppat.1009117.s004.pdf]
