# Supplementary material for: Highly efficient CRISPR-Cas9-mediated gene knockout in primary human B cells for functional genetic studies of Epstein-Barr virus infection
Source: PubMed Central journal article supplement (PMC8078793; doi:10.1371/journal.ppat.1009117), 2021-04-15
Supplement: ppat.1009117.s007.pdf [file ppat.1009117.s007.pdf]

**Supplementary Table 2. crRNA sequences**

| <b>Target gene</b> | <b>IDT design ID</b> | <b>Naming in the text</b> | <b>Nucleotide sequence (5' - 3')</b> | <b>PAM sequence</b> | <b>Purpose</b>         |
|--------------------|----------------------|---------------------------|--------------------------------------|---------------------|------------------------|
| CD46               | Hs.Cas9.CD46.1.AA    | CD46-gRNA 1               | TCGTTACCAATCTCATAGT                  | AGG                 | CRISRP-Cas9 technology |
| CD46               | Hs.Cas9.CD46.1.AD    | CD46-gRNA 2               | TTTGTGATCGGAATCATACA                 | TGG                 | CRISRP-Cas9 technology |
| CDKN2A             | Hs.Cas9.CDKN2A.1.AA  | CDKN2A-gRNA               | CCCAACGCACCGAATAGTTA                 | CGG                 | CRISRP-Cas9 technology |
