# Supplementary material for: Highly efficient CRISPR-Cas9-mediated gene knockout in primary human B cells for functional genetic studies of Epstein-Barr virus infection
Source: PubMed Central journal article supplement (PMC8078793; doi:10.1371/journal.ppat.1009117), 2021-04-15
Supplement: ppat.1009117.s008.pdf [file ppat.1009117.s008.pdf]

| Supplementary Table 3. List of Primer pairs |        |         |                                                             |                      |
|---------------------------------------------|--------|---------|-------------------------------------------------------------|----------------------|
| No                                          | Gene   | Strand  | Nucleotide sequence (5' - 3')                               | Purpose              |
| 1                                           | CD46   | forward | CTGTACTACCTGCTGCCAGACC                                      | Gel electrophoresis  |
| 2                                           | CD46   | reverse | ATAACAGGCGTCATCTGAGACAGG                                    | Gel electrophoresis  |
| 3                                           | CD46   | forward | ACACTTTCCCTACACGACGctcttccgatctCTGTACTACCTGCTGCCAGACC       | Miseq-single end seq |
| 4                                           | CD46   | reverse | TGACTGGAGTTCAGACGTGTGctcttccgatctATAACAGGCGTCATCTGAGACAGG   | Miseq-single end seq |
| 5                                           | CD46   | forward | ACACTTTCCCTACACGACGctcttccgatctGACCACAGTCCATGGCTGATG        | Miseq-paired end seq |
| 6                                           | CD46   | reverse | TGACTGGAGTTCAGACGTGTGctcttccgatctCATCACCGTAGTGGAAATATGTACCC | Miseq-paired end seq |
| 7                                           | CDKN2A | forward | ACACTTTCCCTACACGACGctcttccgatctCGTCCTCCAGAGTCGCCC           | Miseq-single end seq |
| 8                                           | CDKN2A | reverse | TGACTGGAGTTCAGACGTGTGctcttccgatctCTGCGGAGAGGGGGAGAG         | Miseq-single end seq |
